# Supplementary material
Source: PubMed Central journal article supplement (PMC4589482)

ONLINE SUPPLEMENT

Ethnic Differences in Post-Stroke Quality of Life in the  
Brain Attack Surveillance in Corpus Christi (BASIC) Project

Figure I. Ethnic differences in the average quality of life (QOL) score (Mexican American vs non-Hispanic White) for (A) Post-stroke Overall QOL, (B) Post-stroke Physical QOL, and (C) Post-stroke Psychosocial QOL at the 25<sup>th</sup>, 50<sup>th</sup> and 75<sup>th</sup> percentile of age distribution (adjusted for demographic, clinical, pre-stroke characteristics, post-stroke neurologic outcome, and interaction between post-stroke neurologic outcome and age).

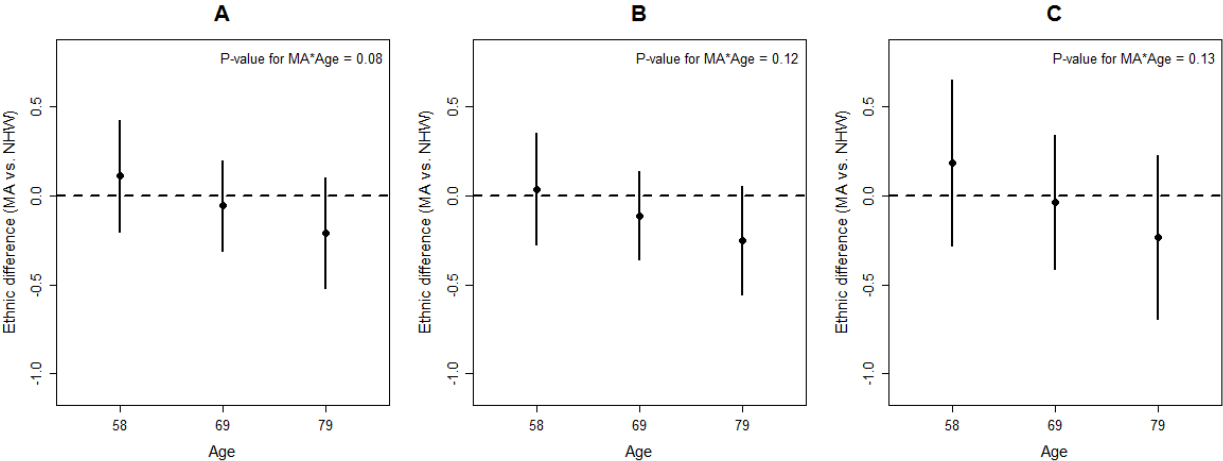

Supplement: NIHMS710737-supplement-Figure_I.pdf [file NIHMS710737-supplement-Figure_I.pdf]
